# Supplementary material for: Rational combination treatment with histone deacetylase inhibitors and immunomodulatory drugs in multiple myeloma
Source: PubMed Central journal article supplement (PMC4476017; doi:10.1038/bcj.2015.38), 2015-05-15
Supplement: bcj201538x6.pdf [file bcj201538x6.pdf]

MM.1S + MS275 + Len (MS275 48h, then Len 48h)

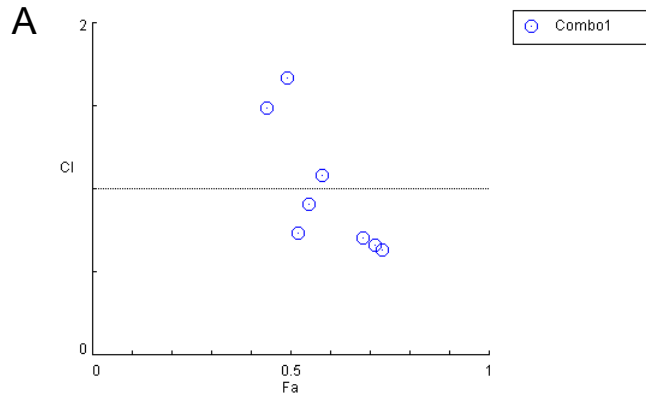

MM.1S + ACY1215 + Len (ACY1215 48h, then Len 48h)

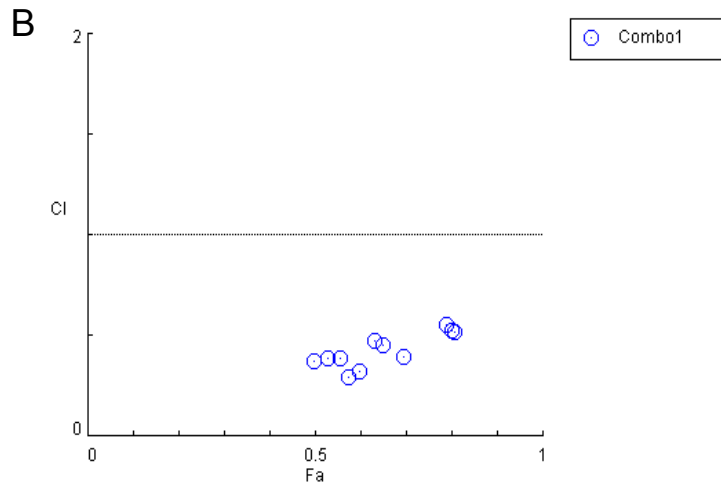

Suppl. Figure S5
