# Supplementary material for: Rational combination treatment with histone deacetylase inhibitors and immunomodulatory drugs in multiple myeloma
Source: PubMed Central journal article supplement (PMC4476017; doi:10.1038/bcj.2015.38), 2015-05-15
Supplement: bcj201538x7.pdf [file bcj201538x7.pdf]

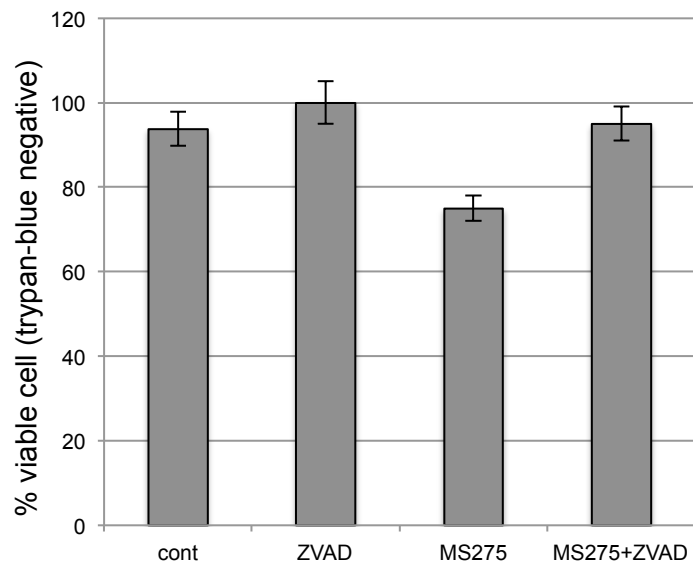

Suppl. Figure S6
